# Supplementary material for: Exploring the Interactions of Ruthenium (II) Carbosilane Metallodendrimers and Precursors with Model Cell Membranes through a Dual Spin-Label Spin-Probe Technique Using EPR
Source: PubMed Central journal article supplement (PMC6843795; doi:10.3390/biom9100540), 2019-09-27
Supplement: biomolecules-09-00540-s001.pdf [file biomolecules-09-00540-s001.pdf]

## Electronic Supporting Information

# Exploring the interactions of ruthenium(II) carbosilane metallodendrimers and precursors with model cell membranes through a dual Spin-Label Spin-Probe technique using EPR

*Riccardo Carloni<sup>1†</sup>, Natalia Sanz del Olmo<sup>234†</sup>, Paula Ortega<sup>234</sup>, Alberto Fattori<sup>1</sup>, Rafael Gómez<sup>234</sup>, Maria Francesca Ottaviani<sup>1</sup>, Sandra García-Gallego<sup>234</sup>, Michela Cangiotti<sup>1\*</sup> and F. Javier de la Mata<sup>234\*</sup>*

<sup>a</sup>Department of Pure and Applied Sciences, University of Urbino “Carlo Bo”, Urbino, Italy.

<sup>b</sup>Department of Organic and Inorganic Chemistry, and Research Institute in Chemistry “Andrés M. del Río” (IQAR), University of Alcalá, Madrid, Spain;

<sup>c</sup>Networking Research Center on Bioengineering, Biomaterials and Nanomedicine (CIBER-BBN), Spain.

<sup>d</sup>Institute Ramón y Cajal for Health Research (IRYCIS), Spain.

## Figures

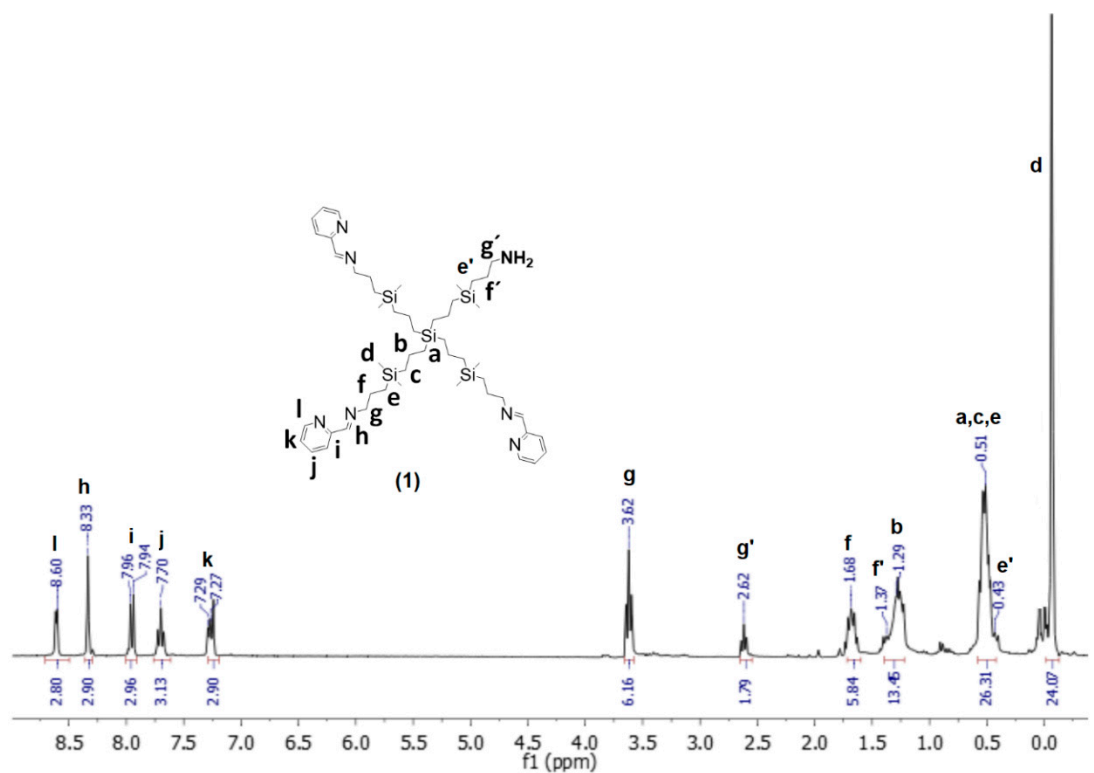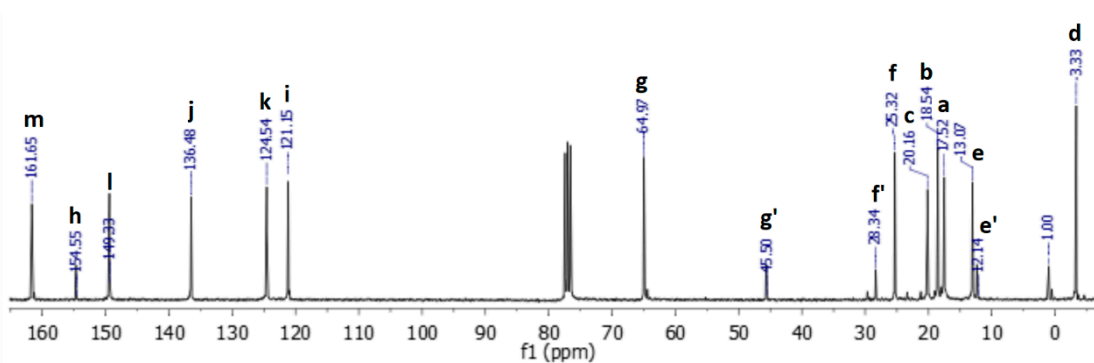

**Figure S1.**  $^1\text{H}$ - and  $^{13}\text{C}\{^1\text{H}\}$ -NMR spectra of compound **1** in  $\text{CDCl}_3$ .

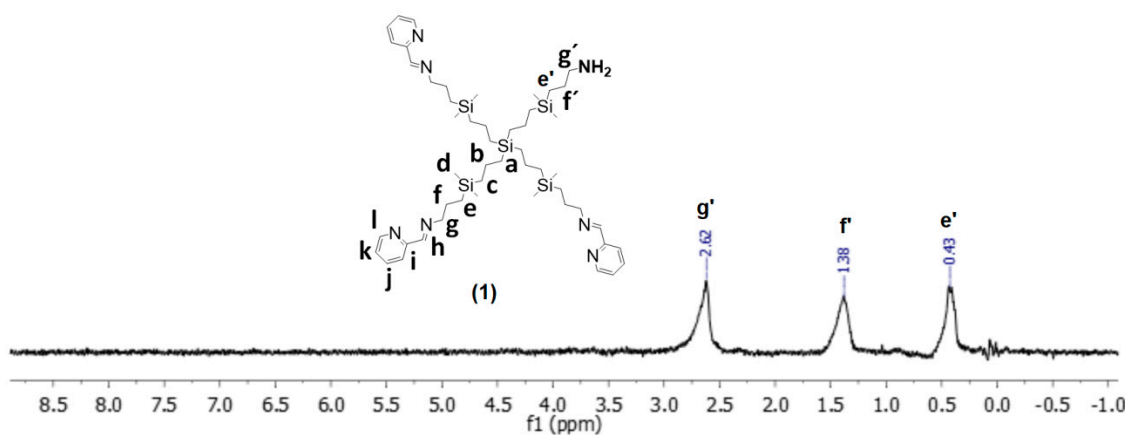

**Figure S2.** TOCSY 1D spectrum of compound **1** in  $\text{CDCl}_3$ .

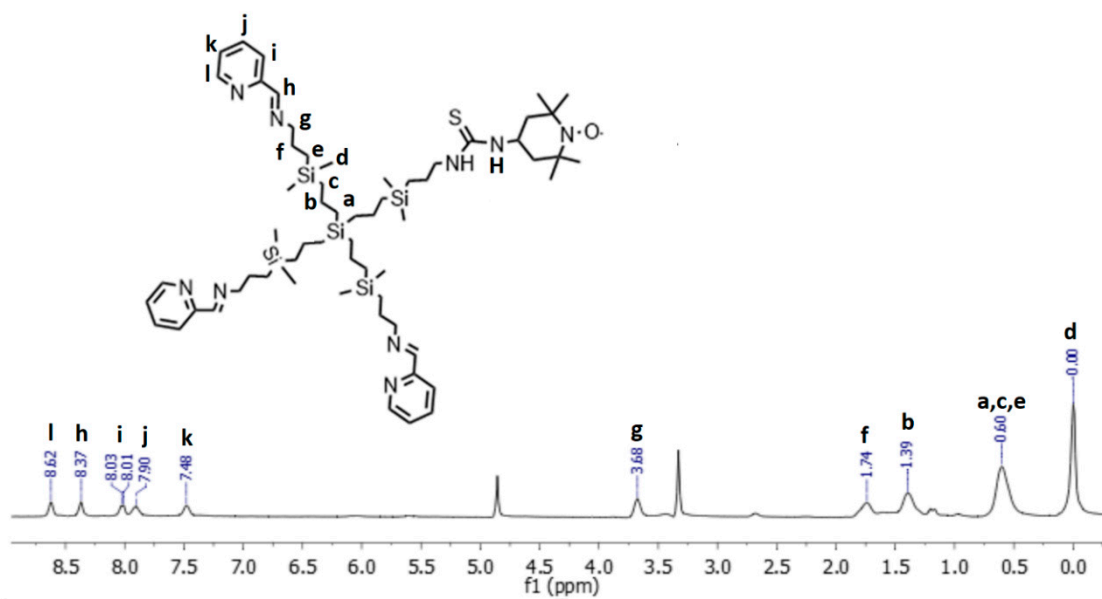

**Figure S3.**  $^1\text{H-NMR}$  spectrum of compound **3** in  $\text{CD}_3\text{OD}$ .

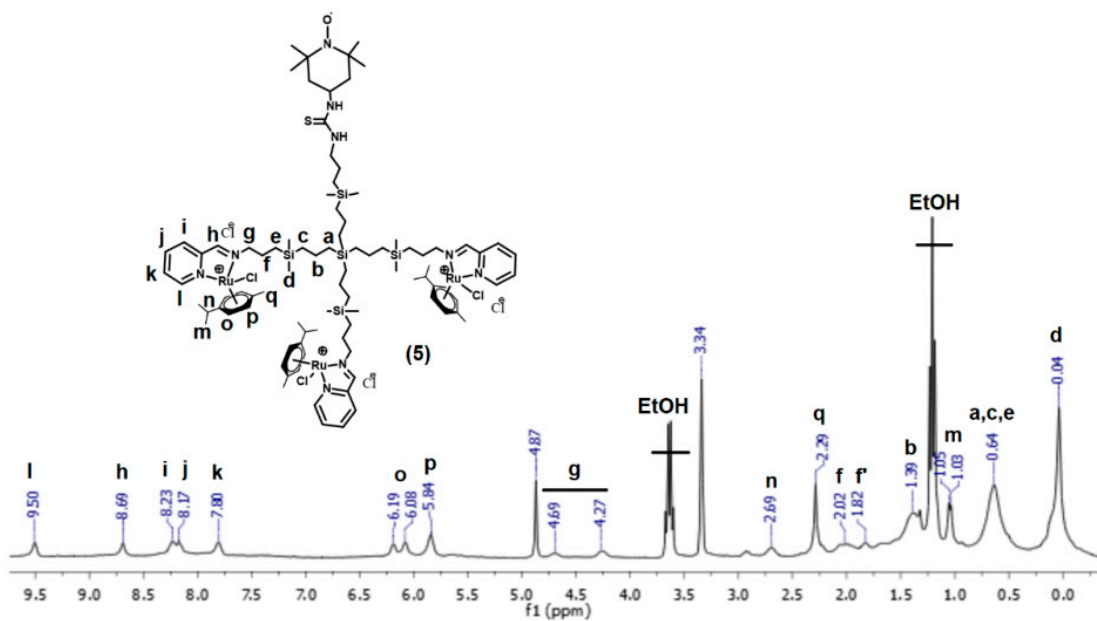

**Figure S4.**  $^1\text{H-NMR}$  spectrum of compound **5** in  $\text{CD}_3\text{OD}$ .

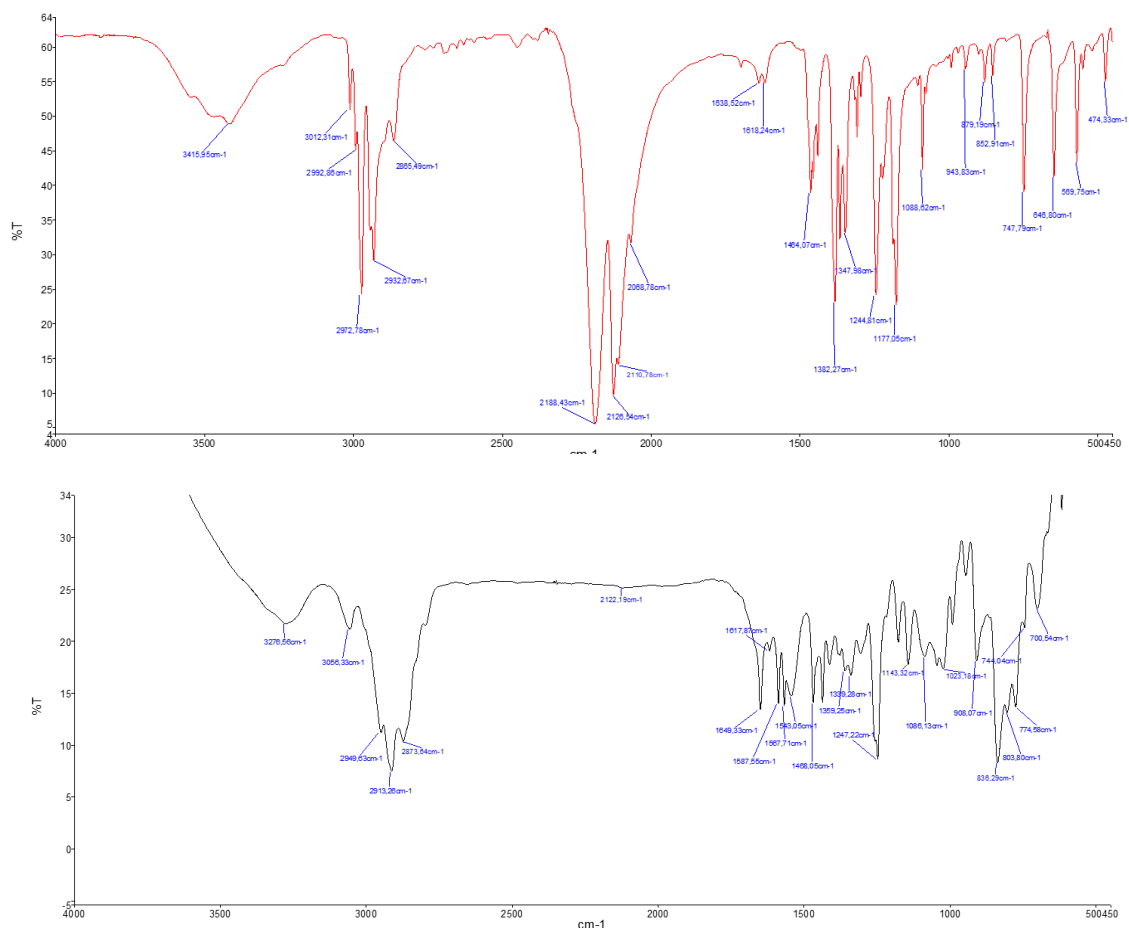

**Figure S5.** FT-IR spectra of precursor 4-isothiocyanateTEMPO (top) and compound 3 (bottom) in KBr.

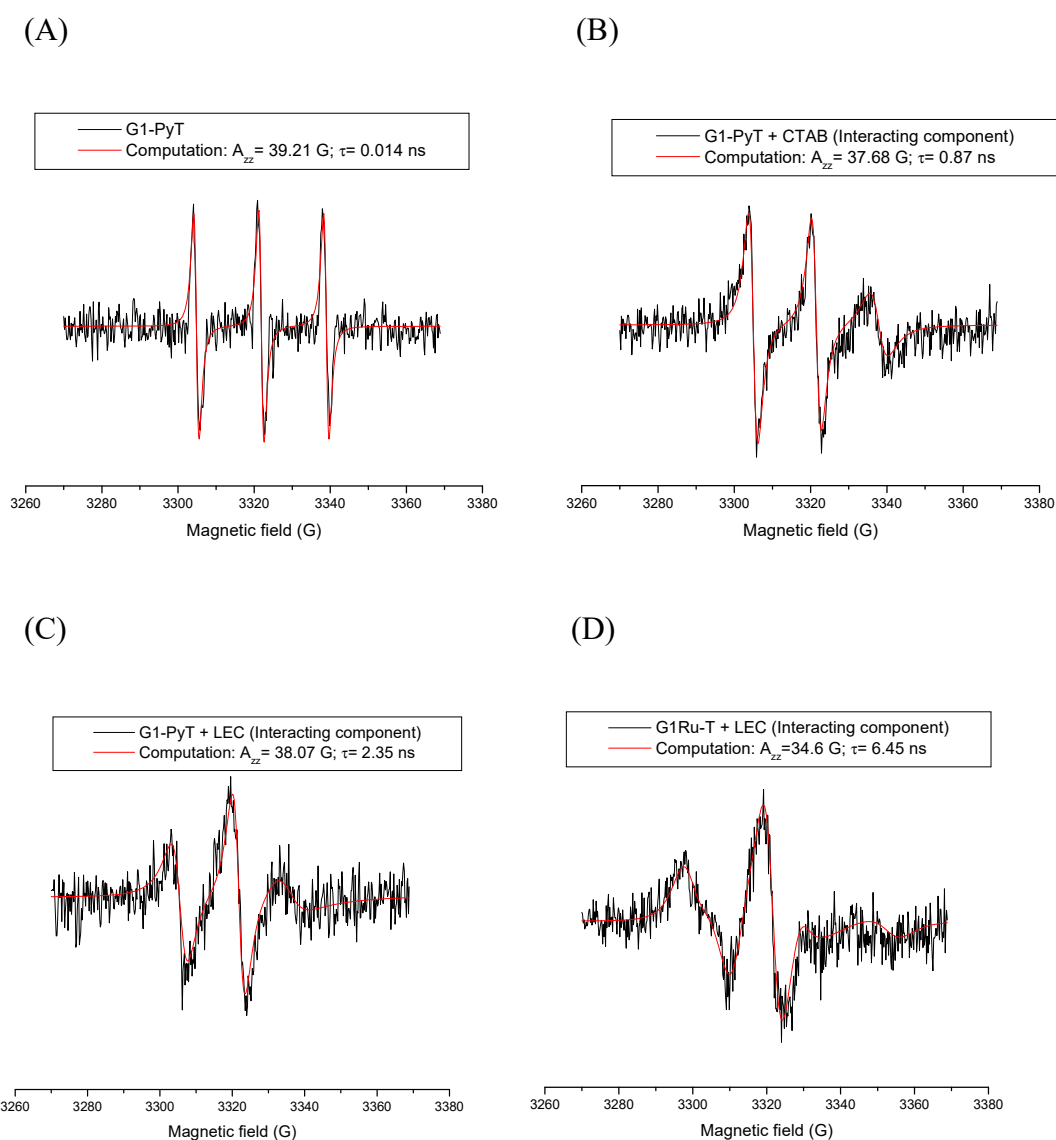

**Figure S6.** Examples of experimental and computed spectra of labelled dendrimers in the absence and presence of model membranes. Experimental and computed spectra of G<sub>1</sub>-PyT, only constituted by the Free component (A). Experimental and computed Interacting component, obtained after subtraction of the Free component, of: (B) G<sub>1</sub>-PyT+CTAB; (C) G<sub>1</sub>-PyT+LEC; (D) G<sub>1</sub>-RuT+LEC. The spectra are normalized in height.

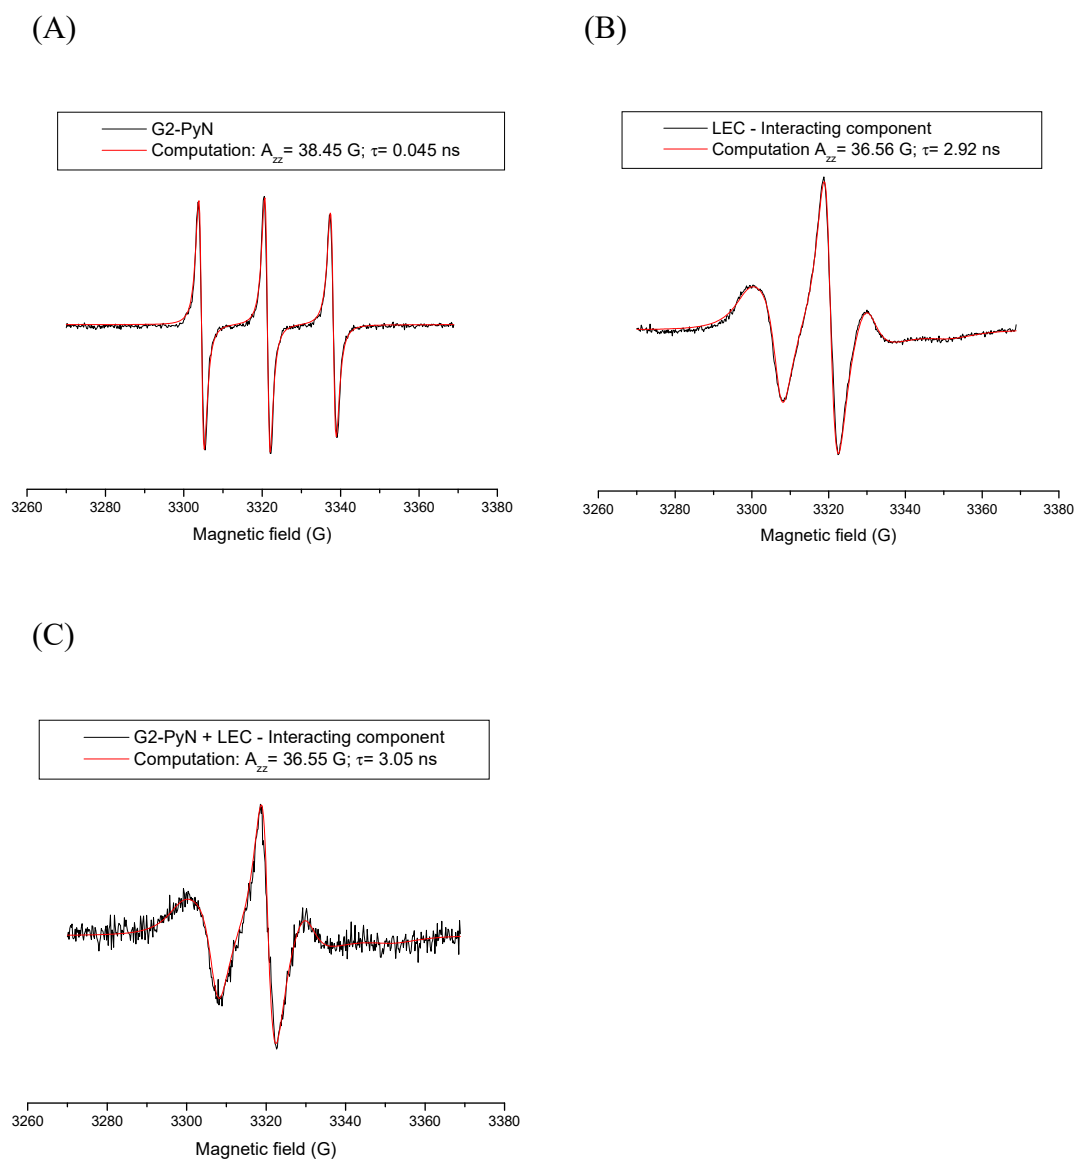

**Figure S7.** Examples of experimental and computed spectra of non-labelled dendrimers in the absence and presence of model membranes. Experimental and computed spectra of CAT12 in G<sub>2</sub>-PyN, only constituted by a free component (A). Examples of computations of the interacting component for CAT12 in: LEC (B); and G<sub>2</sub>-PyN+LEC (C).

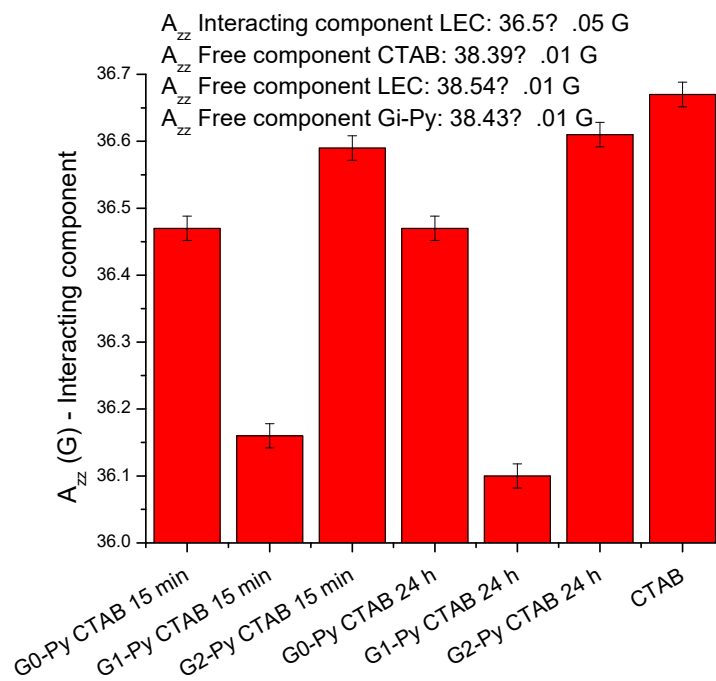

**Figure S8:**  $A_{zz}$  values obtained by computing the Free and the Interacting components for CTAB for homofunctional dendrimers  $G_n$ -Py.
